# Supplementary material
Source: Royal Society of Chemistry journal article supplement (doi:10.1039/d6py00189k)
Supplement: d6py00189k1.pdf [file d6py00189k1.pdf]

## Supporting Information

### **Single-chain Level Decoding of the Conformational Distribution in Bisphenol A Polycarbonate**

Yining Wang<sup>†</sup>, Xinxin Bao<sup>†</sup>, Wentao Yuan<sup>†</sup>, Yuchen Wang<sup>†</sup>, Hu-jun Qian<sup>§</sup>, Zhong-yuan Lu<sup>§</sup>, Yu Bao<sup>\*·</sup>  
<sup>†</sup>, Shuxun Cui<sup>\*·‡</sup>

<sup>†</sup> School of Chemistry, Southwest Jiaotong University, Chengdu 610031, China

<sup>‡</sup> Department of Chemistry, College of Sciences, Northeastern University, Shenyang 110819, China

<sup>§</sup> State Key Laboratory of Supramolecular Structure and Materials, Institute of Theoretical Chemistry, Jilin University, Changchun 130023, China

\* Corresponding authors: baoyu@swjtu.edu.cn; cuishuxun@neu.edu.cn

## **Contents**

|                                                        |           |
|--------------------------------------------------------|-----------|
| <b>Details of the QM-based models .....</b>            | <b>3</b>  |
| <b>Details of the area-deviation calculation .....</b> | <b>3</b>  |
| <b>Details of the TSQM-WLC model .....</b>             | <b>4</b>  |
| <b>Supporting figures and table.....</b>               | <b>7</b>  |
| <b>References.....</b>                                 | <b>26</b> |

## Details of the QM-based models

The worm-like chain (WLC) model has been used to describe the theoretical single-chain elasticity of a semi-rigid or rigid polymer chain.<sup>1-3</sup> In the WLC model, the relationship between the end-to-end distance  $R$  of a polymer chain and stretching force  $F$  can be written as follows:

$$F \frac{l_p}{k_B T} = \frac{R}{L[F]} + \frac{1}{4(1-R/L[F])^2} - \frac{1}{4} \quad (\text{S1})$$

where  $l_p$  is the persistence length,  $L[F]$  is the contour length of a polymer chain upon stretching with force  $F$ ,  $k_B$  is the Boltzmann constant, and  $T$  is the temperature in Kelvin scale. As shown in Eq. S1, there are two free parameters in the WLC model. One is the contour length of the single polymer,  $L[F]$ . The other one is the persistence length,  $l_p$ .

To integrate the QM-derived theoretical elasticity into the WLC model,  $L_0$  is introduced as follows:

$$\frac{F l_p}{k_B T} = \frac{R/L_0}{L[F]/L_0} + 1/[4 \left(1 - \frac{R/L_0}{L[F]/L_0}\right)^2] - \frac{1}{4} \quad (\text{S2})$$

The modified WLC model (Eq. S2, Eq. 3 in the main text), which is integrated with the QM results, is called the QM-WLC model.

The theoretical elasticity of *cis-cis*-PC was also integrated into the FJC and FRC models, resulting in the QM-FRC and QM-FJC models.<sup>4-8</sup> Eqs. S3-4 are given as follows:

$$z_{\text{FRC}} = R/L_0 = (L[F]/L_0) [1 - k_B T / (2F l_b)] \quad (\text{S3})$$

$$z_{\text{FJC}} = R/L_0 = (L[F]/L_0) \left[ \coth \frac{F l_k}{k_B T} - \frac{k_B T}{F l_k} \right] \quad (\text{S4})$$

## Details of the area-deviation calculation

The optimal  $l_p$  can be determined by calculating the area difference between the Type 1 experimental curve and the QM-WLC theoretical curves. The area ( $S$ ) enclosed by the experimental or theoretical curve within this interval was calculated using the trapezoidal integration method, as follows:

$$S = \sum_{i=1}^n \frac{F_i + F_{i-1}}{2} \cdot (R_i - R_{i-1}) \quad (\text{S5})$$

where  $F_i$  and  $F_{i-1}$  are the forces at two adjacent data points, while  $R_i$  and  $R_{i-1}$  are the corresponding normalized extensions, which serve as the two parallel sides (bases) and the height of the trapezoid, respectively.

The normalized area deviation ( $\Delta S$ ) is defined as the area difference obtained by integrating the experimental and theoretical  $F$ - $E$  curves over the normalized extension ( $R/L_0$ ). The corresponding expression is given as follows:

$$\Delta S = |S_e - S_s| \quad (\text{S6})$$

where  $S_e$  is the area enclosed by the experimental curve and the horizontal axis ( $R$ -axis) within the specified interval, and  $S_s$  is the area enclosed by the theoretical curve and the horizontal axis within the same interval.

The optimal QM-WLC fitting parameters for the experimental curve can be determined by identifying the minimum area difference. As shown in Fig. S13b, the best fit for the Type 1 curve is obtained at  $l_p = 0.41$  nm, with a mean deviation close to 0 pN $\cdot(R/L_0)$ . In contrast, the minimum deviation for the Type 2 curve is  $\sim 1.5$  pN $\cdot(R/L_0)$ , indicating that the QM-WLC model cannot adequately describe its behavior.

## Details of the TSQM-WLC model

The TSQM-WLC model is used to quantify the effects of the *trans* conformation on the single-chain mechanics of PC. It is assumed that the PC single chain consists of many modules. Under the action of an external force, each module can undergo a transition between two energetically distinct states: the folded (*trans*) state and the unfolded (*cis*) state. The lengths of the modules in the *trans* and *cis* states are denoted as  $l_f$  and  $l_u$ , respectively. The transition from *trans* to *cis* leads to an extension of the module. At the free state ( $F = 0$ ), the rates of unfolding  $\alpha_0$  and folding  $\beta_0$  can be determined by the following equations:

$$\alpha_0 = \omega e^{-\Delta G_u^*/k_B T} \quad (\text{S7})$$

$$\beta_0 = \omega e^{-\Delta G_f^*/k_B T} \quad (\text{S8})$$

where  $\Delta G_u^*$  is the activation barrier for unfolding,  $\Delta G_f^*$  is the activation barrier for folding,  $\omega$  is the reciprocal of the diffusive relaxation time.

According to the Bell-Evans model,<sup>9, 10</sup> when the module is stretched by an external force, the altered unfolding and folding rate can be calculated by the following equations, respectively:

$$\alpha_1 = \omega e^{-(\Delta G_u^* - Fx_u)/k_B T} = \alpha_0 e^{Fx_u/k_B T} \quad (\text{S9})$$

$$\beta_1 = \omega e^{-(\Delta G_f^* + Fx_f)/k_B T} = \beta_0 e^{-Fx_f/k_B T} \quad (\text{S10})$$

where  $F$  is the external force,  $x_u$  and  $x_f$  are the widths of the activation barrier for unfolding and folding, respectively.

At equilibrium, the number of folding and unfolding modules follow the relationship below:

$$\alpha_1 N_f = \beta_1 N_u = \beta_1 (N - N_f) \quad (\text{S11})$$

where  $N$  is the number of all the modules in the chain,  $N_f$  and  $N_u$  are the number of the folded and unfolded modules in the chain under an external force at equilibrium, respectively.

Thus,  $N_f$  and  $N_u$  under a given force can be calculated by the following equations, respectively:

$$N_f = \frac{\beta_1}{\alpha_1 + \beta_1} N = \frac{1}{e^{(-\Delta G + F\Delta L)/k_B T + 1}} N \quad (\text{S12})$$

$$N_u = \frac{\alpha_1}{\alpha_1 + \beta_1} N = \frac{1}{e^{(\Delta G - F\Delta L)/k_B T + 1}} N \quad (\text{S13})$$

where  $\Delta G$  is the free energy difference of the module between two states,  $\Delta L$  is the length difference of the module between two states ( $\Delta L = l_u - l_f$ ).

For a PC chain consisting of a large number of modules, the polymer contour length ( $L_{TS}$ ) at a given force without the elastic contribution can be calculated by:

$$L_{TS} = N_f l_f + N_u l_u = N \left[ \frac{l_f}{e^{(-\Delta G + F\Delta L)/k_B T + 1}} + \frac{l_u}{e^{(\Delta G - F\Delta L)/k_B T + 1}} \right] \quad (\text{S14})$$

The  $L_{TS}$  and the polymer chain extension  $R_{TS}$  follow the relationship described in the QM-WLC model, in which both entropic and enthalpic elasticity are considered:

$$R_{TS}/L_{TS} = z_{WLC} = R/L_0 \quad (\text{S15})$$

Hence, the value of  $R_{TS}$  can be calculated using the equation:  $R_{TS} = L_{TS} \cdot z_{WLC}$ . In the TSQM-WLC model, the normalized extension of PC is:

$$Z_{TS} = R_{TS}/L_0 = z_{WLC} L_{TS}/N l_u = \left[ \frac{l_f}{e^{(-\Delta G + F\Delta L)/k_B T + 1}} + \frac{l_u}{e^{(\Delta G - F\Delta L)/k_B T + 1}} \right] \cdot z_{WLC}/l_u \quad (\text{S16})$$

where  $z_{WLC}$  is the normalized extension of a polymer chain in the QM-WLC model,  $N l_u$  is the contour length of *cis-cis*-PC at zero force.

In the TSQM-WLC model, the value of  $L[F]/L_0$  is force-dependent and is used to evaluate the deformation of the bond length and angle of the backbone during stretching. Additionally, the value of  $\left[ \frac{l_f}{e^{(-\Delta G + F\Delta L)/k_B T + 1}} + \frac{l_u}{e^{(\Delta G - F\Delta L)/k_B T + 1}} \right]$  is used to assess the deformation of the bond lengths and angles of the backbone influenced by the *trans* conformation during stretching. Therefore, both components are used to measure the enthalpy contributions to the single-chain mechanics of PC. The remaining parts of the TSQM-WLC model are used to evaluate the entropy contributions.

In the TSQM-WLC model, the three variables are  $\Delta G$ ,  $l_f$ , and  $l_u$ , whereas  $\Delta L = l_u - l_f$ , is not an independent variable. In the two-state model used in this work, the parameter  $l_u$  corresponds to the persistence length of the unfolded state (*cis* conformation). According to the QM-WLC fitting of Type 1, the persistence length of the *cis* conformational module was determined to be 0.41 nm; therefore,  $l_u$  was fixed at 0.41 nm. The model thus retains only two free parameters,  $\Delta G$  and  $l_f$ .

The two-state model was established by incorporating the difference between the *cis* and *trans* states into the QM-WLC framework. Therefore, in the absence of any distinction between the two states, the TSQM-WLC model reduces to the QM-WLC model, corresponding to the initial condition  $l_u = l_f = 0.41$  nm and  $\Delta G = 0$   $k_B T$  module<sup>-1</sup>. Based on this, since the folded state is more compact than the extended state,  $l_f$  was scanned downward from 0.41 nm; because the stretching process requires additional energy input,  $\Delta G$  was scanned upward from 0  $k_B T$  module<sup>-1</sup>.

To determine the optimal parameters, we first fixed  $\Delta G = 0$  and evaluated  $l_f$  by comparing the area deviation between the theoretical and experimental curves. The results show that as  $l_f$  decreases, the area deviation initially decreases (Fig. S16a), reaches a minimum at  $l_f = 0.38$  nm, and then increases again. Subsequently, based on this result,  $l_f$  was fixed at 0.38 nm, and it was found that the area deviation decreases with increasing  $\Delta G$  (Fig. S16b), reaching a minimum (approaching zero) at  $\Delta G = 0.45$   $k_B T$  module<sup>-1</sup>, after which it increases again. Therefore, the optimal fitting parameters were determined to be  $l_f = 0.38$  nm and  $\Delta G = 0.45$   $k_B T$  module<sup>-1</sup>.

## Supporting figures and table

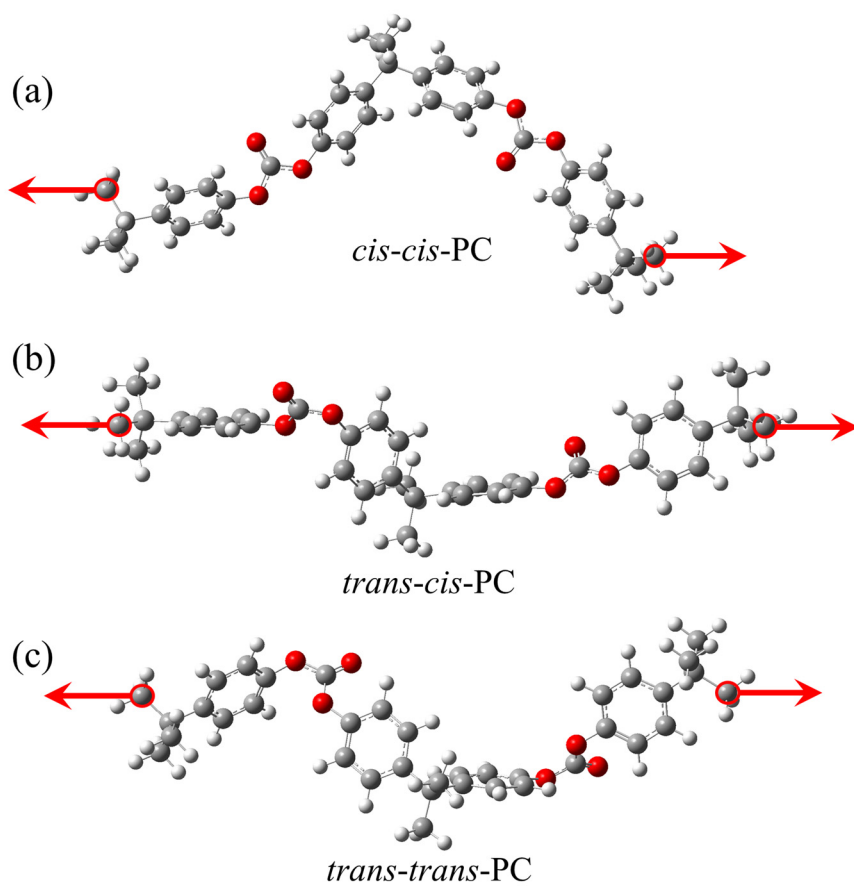

**Figure S1.** PC dimer structures with (a) *cis-cis*, (b) *trans-cis*, and (c) *trans-trans* conformation used for QM calculations. Atomic color scheme: white = hydrogen (H), gray = carbon (C), blue = nitrogen (N), red = oxygen (O). Red arrows indicate terminal C atoms.

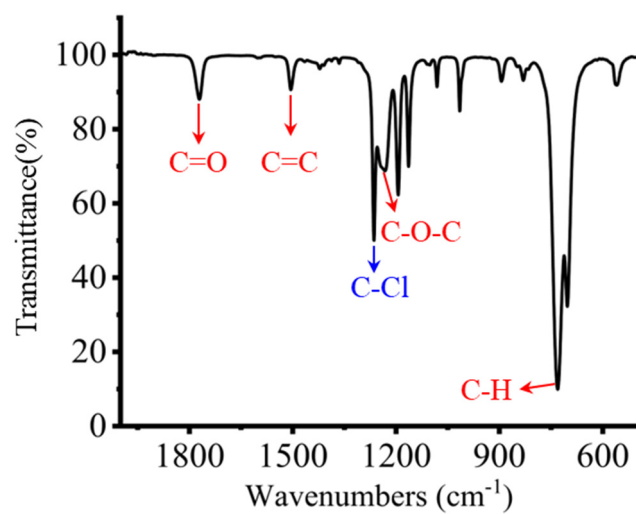

**Figure S2.** Full-range FTIR spectra of the PC sample in the 2000–550 cm<sup>-1</sup> region.

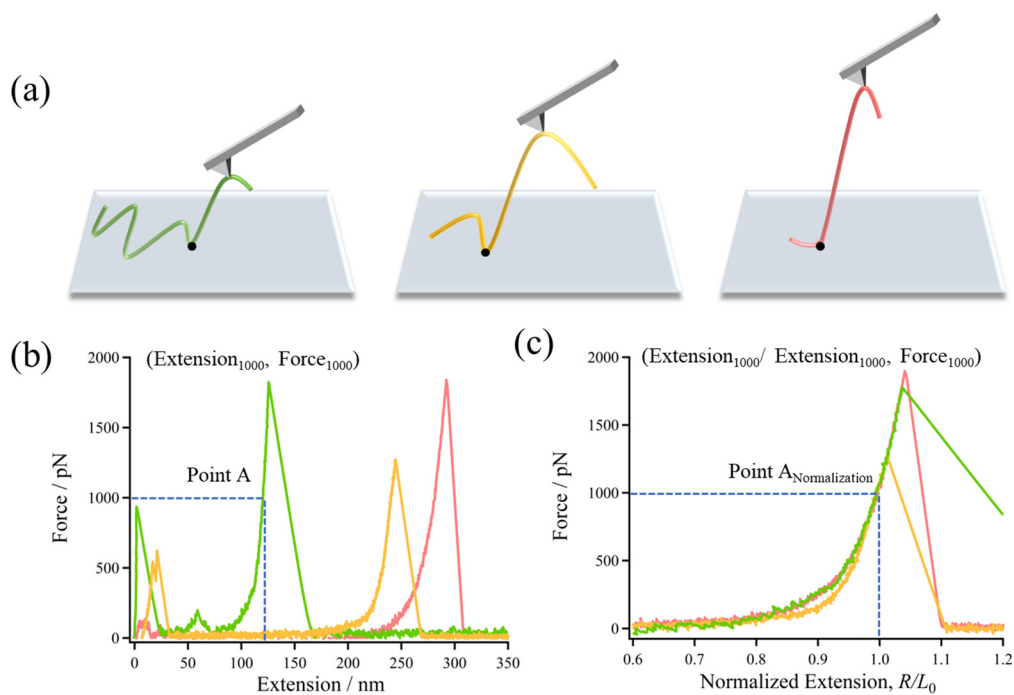

**Figure S3.** (a) Several conditions of the PC being stretched in nonane. The black dot indicates the attachment point of the PC to the substrate. (b) Several  $F$ - $E$  curves of PC acquired in nonane. The coordinate of point A on the green  $F$ - $E$  curve can be expressed as  $(\text{Extension}_{1000}, \text{Force}_{1000})$ . (c) Normalized  $F$ - $E$  curves derived from (b). The coordinate of point A<sub>Normalization</sub> in the green  $F$ - $E$  curve can be expressed as  $(\text{Extension}_{1000}/\text{Extension}_{1000}, \text{Force}_{1000})$ .

**Table S1.** Type 1/Type 2 population ratio in different environments or solvents.

|                     | <b>Specific<br/>Condition</b> | <b>Type 1: Type 2<br/>Raw ratio</b> | <b>Type 1: Type 2<br/>Normalized ratio</b> |
|---------------------|-------------------------------|-------------------------------------|--------------------------------------------|
| <b>Solvents</b>     | PC/DCM                        | 12:13                               | 1:1.08                                     |
|                     | PC/DMF                        | 7:6                                 | 1:0.85                                     |
|                     | PC/DMSO                       | 5:6                                 | 1:1.22                                     |
| <b>Environments</b> | Nonane                        | 12:14                               | 1:1.17                                     |
|                     | DMF                           | 7:6                                 | 1:0.86                                     |
|                     | n-pentanol                    | 6:5                                 | 1:0.83                                     |

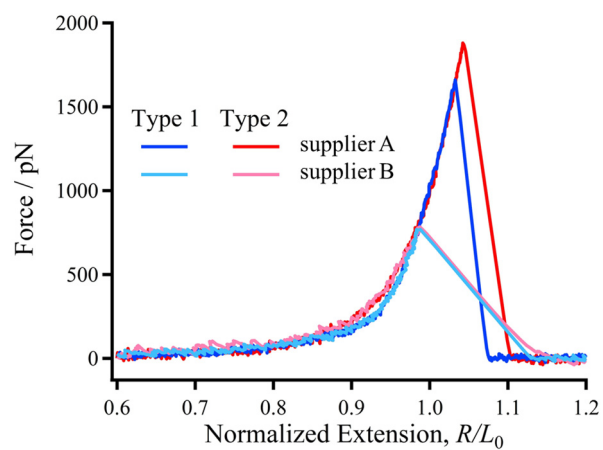

**Figure S4.** Comparison of the normalized  $F$ - $E$  curves of PC from different suppliers obtained in nonane.

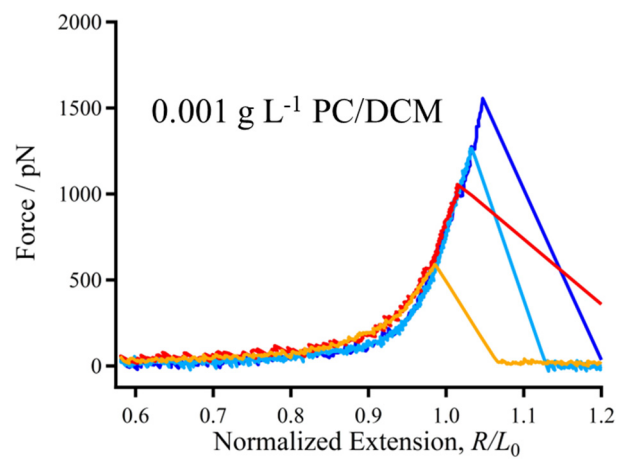

**Figure S5.** The normalized  $F$ - $E$  curves of PC from a 0.001 g L<sup>-1</sup> PC/DCM solution obtained in nonane.

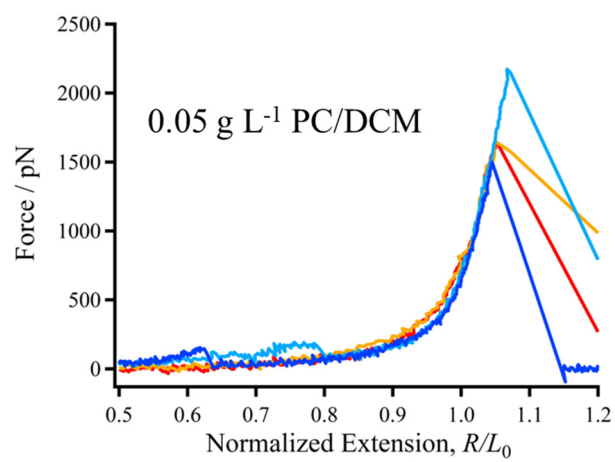

**Figure S6.** The normalized  $F$ - $E$  curves of PC from a 0.05 g L<sup>-1</sup> PC/DCM solution obtained in nonane.

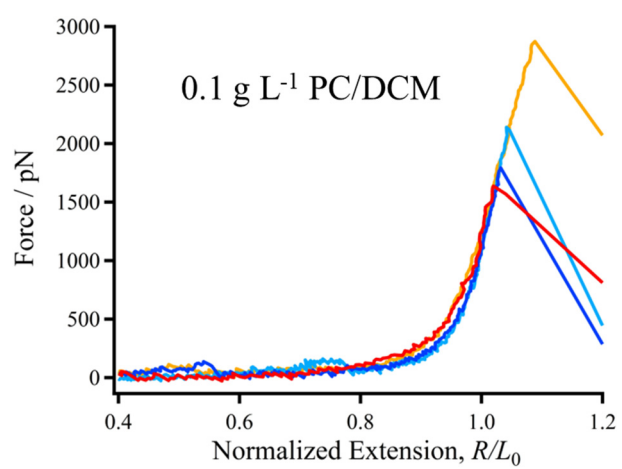

**Figure S7.** The normalized  $F$ - $E$  curves of PC from a 0.1 g L<sup>-1</sup> PC/DCM solution obtained in nonane.

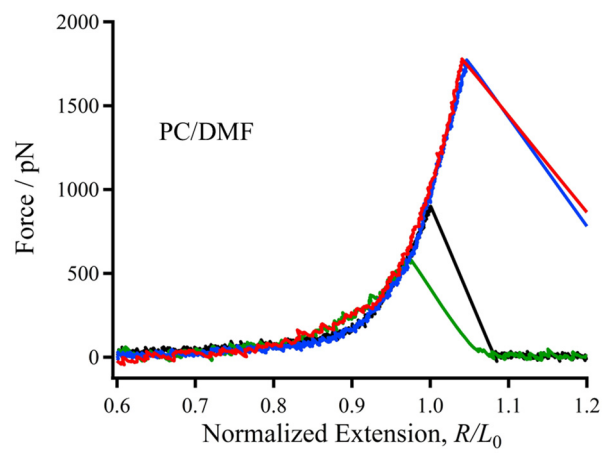

**Figure S8.** The normalized  $F$ - $E$  curves of PC from a PC/DMF solution obtained in nonane.

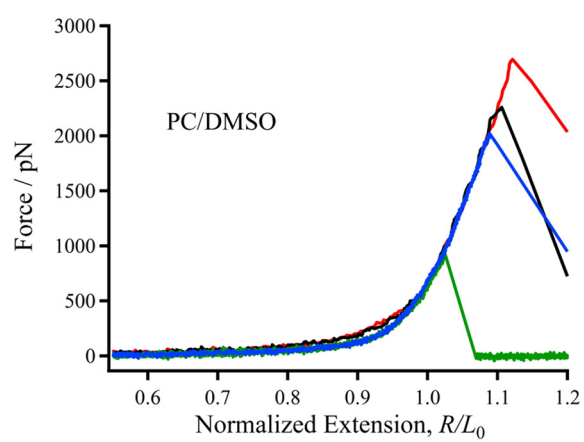

**Figure S9.** The normalized  $F$ - $E$  curves of PC from a PC/DMSO solution obtained in nonane.

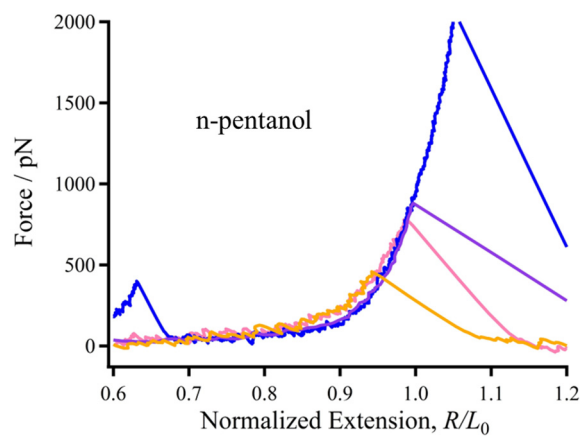

**Figure S10.** The normalized  $F$ - $E$  curves of PC from a PC/DCM solution acquired in n-pentanol.

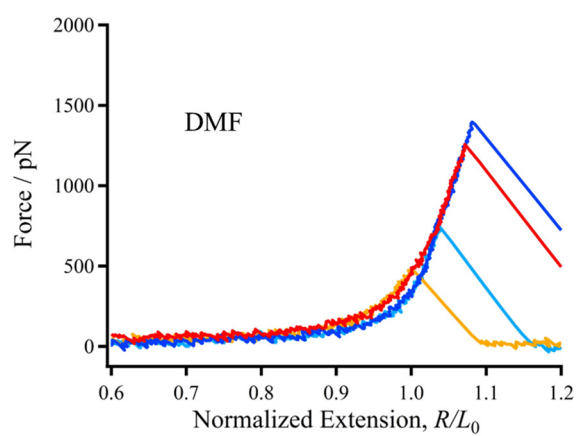

**Figure S11.** The normalized  $F$ - $E$  curves of PC from a PC/DCM solution acquired in DMF.

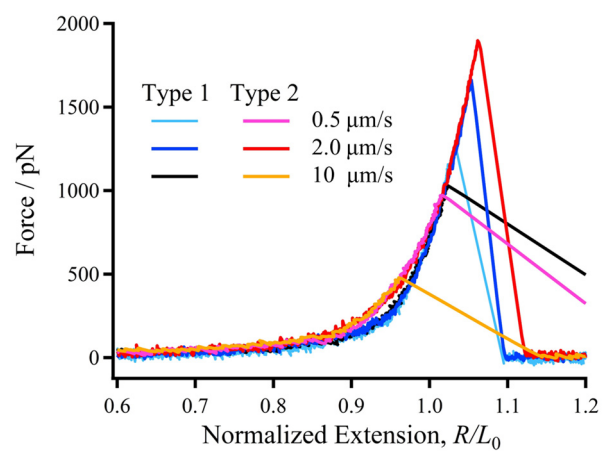

**Figure S12.** The normalized single-chain  $F-E$  curves of PC from a 0.01 g/L PC/DCM solution obtained in nonane at different stretching velocities (0.5, 2.0, and 10  $\mu\text{m/s}$ ).

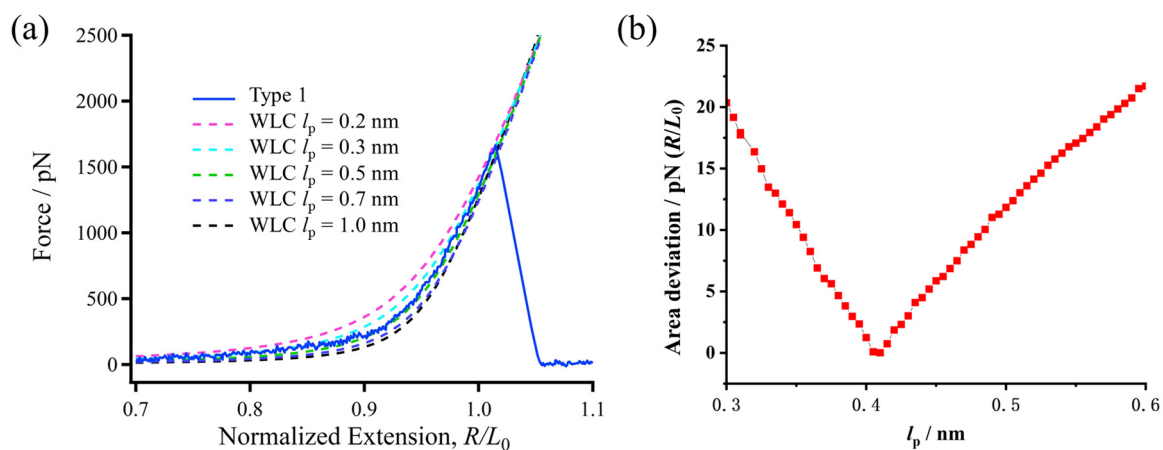

**Figure S13.** (a) Comparison between the Type 1 curve of PC (solid blue line) and the QM-WLC fitting curves with different  $l_p$  values:  $l_p = 0.2$  nm (dashed pink line),  $l_p = 0.3$  nm (dashed cyan line),  $l_p = 0.5$  nm (dashed green line),  $l_p = 0.7$  nm (dashed purple line), and  $l_p = 1.0$  nm (dashed black line). (b) The area deviation between the Type 1 curve of PC obtained in nonane and the corresponding QM-WLC fitting curves plotted as a function of  $l_p$ , showing a minimum approaching zero at  $l_p = 0.41$  nm.

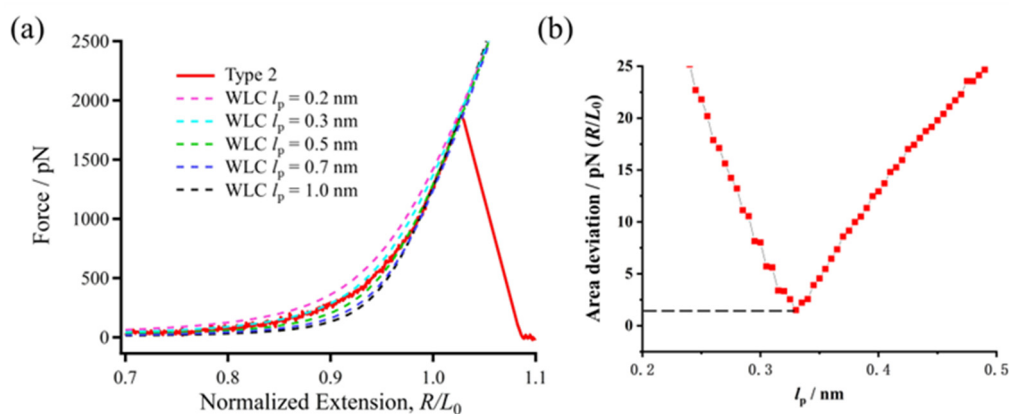

**Figure S14.** Comparison between the Type 2 curve of PC (solid red line) and the QM-WLC model with different  $l_p$  values:  $l_p = 0.2$  nm (dashed pink line),  $l_p = 0.3$  nm (dashed cyan line),  $l_p = 0.5$  nm (dashed green line),  $l_p = 0.7$  nm (dashed purple line), and  $l_p = 1.0$  nm (dashed black line). (b) The area deviation between the Type 2 curve of PC obtained in nonane and the QM-WLC fitting curves with varying  $l_p$  values reached a minimum of  $1.51 \text{ pN} \cdot (R/L_0)$ .

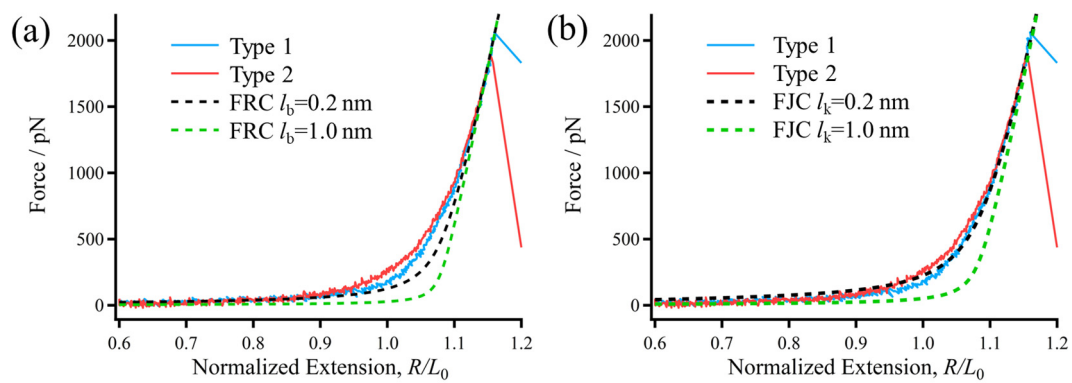

**Figure S15.** Comparison of Type 1 (solid blue line) and Type 2 (solid red line) curves with (a) QM-FRC model fits using  $l_b = 0.2$  nm (dashed black line) and 1.0 nm (dashed green line), and (b) QM-FJC model fits using  $l_k = 0.2$  nm (dashed black line) and 1.0 nm (dashed green line).

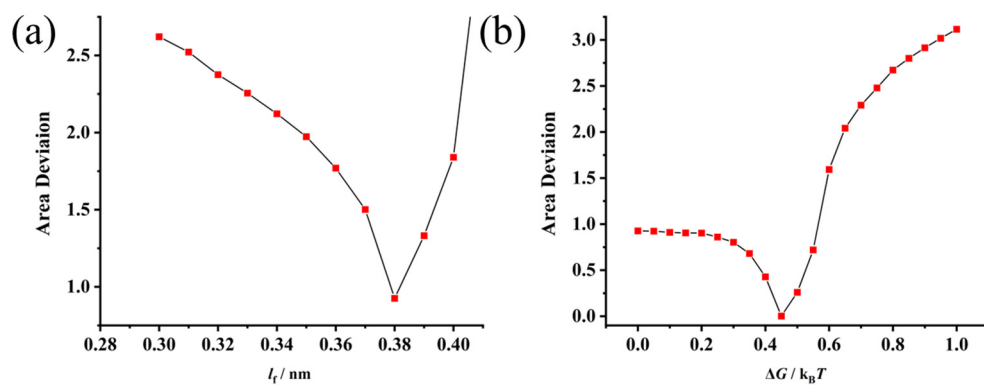

**Figure S16.** The area deviation between the Type 2 curve of PC obtained in nonane and the TSQM-WLC fitting curves, (a) with  $\Delta G = 0 k_B T \text{ module}^{-1}$  and  $l_f = 0.3\text{-}0.41 \text{ nm}$ ; (b) with  $l_f = 0.38 \text{ nm}$  and  $\Delta G = 0\text{-}1 k_B T \text{ module}^{-1}$ .

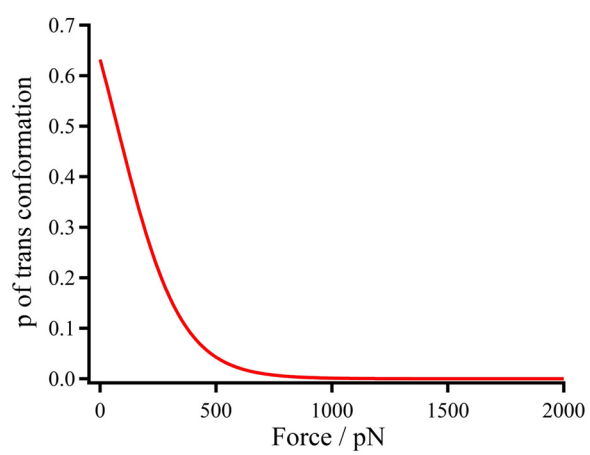

**Figure S17.** Proportion of *trans* conformation of PC under different forces.

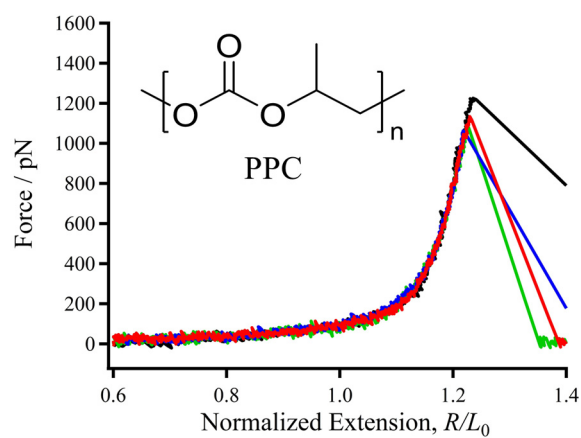

**Figure S18.** Normalized single-chain  $F$ - $E$  curves of PPC from a  $0.01 \text{ g L}^{-1}$  PPC/DCM solution in nonane. Inset: the primary structure of PPC.

## References

- 1 C. Bustamante, J. F. Marko, E. D. Siggia and S. Smith, *Science*, 1994, **265**, 1599-1600.
- 2 K. Wang, X. Pang and S. Cui, *Langmuir*, 2013, **29**, 4315-4319.
- 3 T. Hugel, M. Rief, M. Seitz, H. E. Gaub and R. R. Netz, *Phys. Rev. Lett.*, 2005, **94**, 048301.
- 4 T. Hugel and M. Seitz, *Macromol. Rapid Commun.*, 2001, **22**, 989-1016.
- 5 A. Janshoff, M. Neitzert, Y. Oberdörfer and H. Fuchs, *Angew. Chem. Int. Ed.*, 2000, **39**, 3212-3237.
- 6 L. Livadaru, R. R. Netz and H. J. Kreuzer, *Macromolecules*, 2003, **36**, 3732-3744.
- 7 K. Nakajima, H. Watabe and T. Nishi, *Polymer*, 2006, **47**, 2505-2510.
- 8 W. Shi, Y. Zhang, C. Liu, Z. Wang, X. Zhang, Y. Zhang and Y. Chen, *Polymer*, 2006, **47**, 2499-2504.
- 9 G. I. Bell, *Science*, 1978, **200**, 618-627.
- 10 E. Evans and K. Ritchie, *Biophys. J.*, 1997, **72**, 1541-1555.
